# Supplementary material for: Vegetable By-Product Lacto-Fermentation as a New Source of Antimicrobial Compounds
Source: PubMed Central journal article supplement (PMC6956321; doi:10.3390/microorganisms7120607), 2019-11-22
Supplement: microorganisms-07-00607-s001.pdf [file microorganisms-07-00607-s001.pdf]

**Table S2.** Inhibition zones, expressed in mm, of all the extract obtained after carrot by-products lacto-fermentation. Different LAB were used for the fermentations. *L. plantarum* POM1 and 285, *L. paracasei* 4186, *L. casei* 2246 and 2240 and *L. rhamnosus* 1473 and 1019. The inhibition zones were obtained using 30 µl of extracts concentrated 60 % (w/v).

| Strain      | Time  | <i>Salmonella spp.</i> |        |        |        |       |        | <i>L. monocytogenes</i> |        |           |        |           | <i>E. coli</i> |          |        |           |        | <i>S. aureus</i> |        |           |        | <i>B. cereus</i> |        |            |        |       |        |       |        |
|-------------|-------|------------------------|--------|--------|--------|-------|--------|-------------------------|--------|-----------|--------|-----------|----------------|----------|--------|-----------|--------|------------------|--------|-----------|--------|------------------|--------|------------|--------|-------|--------|-------|--------|
|             |       | ATCC14028              |        | rissen |        | suini |        | LM30                    |        | LMG 21264 |        | LMG 13305 |                | DSM 9025 |        | DSM 10973 |        | POM 1048         |        | NCTC 9393 |        | ATCC 6538        |        | ATCC 19095 |        | 31    | 33     |       |        |
| 1019        | 24 h  | 12.07                  | ± 1.68 | 11.83  | ± 1.44 | 11.50 | ± 0.87 | 15.83                   | ± 1.44 | 13.73     | ± 1.03 | 13.95     | ± 1.23         | 11.49    | ± 2.05 | 11.27     | ± 3.44 | 9.67             | ± 1.15 | 14.17     | ± 1.44 | 14.91            | ± 0.63 | 18.03      | ± 1.34 | 12.03 | ± 2.94 | 12.91 | ± 2.76 |
|             | 48 h  | 11.83                  | ± 1.89 | 11.50  | ± 1.32 | 11.20 | ± 0.72 | 14.33                   | ± 1.15 | 13.47     | ± 0.81 | 13.67     | ± 1.53         | 11.50    | ± 1.80 | 11.00     | ± 3.46 | 9.40             | ± 1.06 | 13.45     | ± 1.18 | 13.73            | ± 0.64 | 16.70      | ± 1.21 | 10.17 | ± 1.24 | 10.68 | ± 2.03 |
|             | 120 h | 10.23                  | ± 0.75 | 10.21  | ± 0.89 | 10.24 | ± 0.99 | 12.29                   | ± 1.12 | 11.64     | ± 2.29 | 11.95     | ± 1.07         | 10.52    | ± 2.60 | 10.45     | ± 3.94 | 8.51             | ± 0.28 | 11.66     | ± 1.38 | 13.45            | ± 0.51 | 15.91      | ± 0.43 | 9.33  | ± 1.89 | 9.37  | ± 2.83 |
| 1473        | 24 h  | 11.00                  | ± 0.00 | 10.67  | ± 0.58 | 9.83  | ± 1.04 | 3.67                    | ± 6.35 | 4.33      | ± 7.51 | 11.00     | ± 3.46         | 7.33     | ± 6.35 | 9.67      | ± 1.15 | 10.00            | ± 1.00 | 13.47     | ± 0.50 | 15.00            | ± 0.00 | 15.00      | ± 0.00 | 12.33 | ± 1.15 | 11.93 | ± 1.36 |
|             | 48 h  | 10.87                  | ± 0.23 | 10.45  | ± 0.64 | 9.67  | ± 1.15 | 12.75                   | ± 2.05 | 12.20     | ± 1.06 | 11.67     | ± 1.15         | 10.73    | ± 0.23 | 9.25      | ± 0.43 | 9.03             | ± 0.45 | 12.88     | ± 0.55 | 13.75            | ± 0.25 | 13.91      | ± 1.01 | 7.03  | ± 6.09 | 8.28  | ± 7.17 |
|             | 120 h | 8.57                   | ± 0.19 | 8.49   | ± 0.45 | 2.91  | ± 5.05 | 3.25                    | ± 5.62 | 11.29     | ± 0.84 | 10.67     | ± 0.29         | 9.58     | ± 1.00 | 2.83      | ± 4.91 | 8.41             | ± 0.48 | 11.33     | ± 0.41 | 12.57            | ± 0.26 | 12.71      | ± 0.61 | 6.20  | ± 5.56 | 6.83  | ± 5.97 |
| 2246        | 24 h  | 15.41                  | ± 0.38 | 12.87  | ± 4.20 | 12.40 | ± 3.08 | 14.40                   | ± 1.22 | 13.17     | ± 4.65 | 13.33     | ± 3.21         | 13.73    | ± 2.19 | 9.41      | ± 2.45 | 11.13            | ± 2.42 | 12.83     | ± 0.52 | 15.20            | ± 3.04 | 15.25      | ± 1.15 | 14.25 | ± 1.74 | 15.70 | ± 1.92 |
|             | 48 h  | 15.17                  | ± 0.76 | 12.80  | ± 4.30 | 11.91 | ± 2.60 | 13.40                   | ± 1.06 | 8.83      | ± 7.65 | 12.83     | ± 3.18         | 13.08    | ± 2.27 | 9.20      | ± 2.60 | 10.83            | ± 2.57 | 12.73     | ± 0.46 | 13.41            | ± 2.50 | 14.50      | ± 1.32 | 13.53 | ± 0.96 | 12.24 | ± 0.50 |
|             | 120 h | 9.33                   | ± 8.14 | 10.00  | ± 8.89 | 8.67  | ± 7.57 | ND                      |        | 8.33      | ± 7.23 | 11.67     | ± 3.06         | 8.67     | ± 7.77 | 6.53      | ± 6.15 | 10.67            | ± 2.52 | 11.03     | ± 0.45 | 12.98            | ± 2.81 | 13.93      | ± 1.29 | 9.27  | ± 8.06 | 7.93  | ± 6.88 |
| 2240        | 24 h  | 11.28                  | ± 0.50 | 10.71  | ± 0.61 | 11.00 | ± 0.35 | 14.41                   | ± 1.70 | 12.67     | ± 1.44 | 13.62     | ± 0.21         | 11.33    | ± 0.76 | 10.33     | ± 0.36 | 11.17            | ± 0.29 | 14.00     | ± 1.00 | 14.97            | ± 0.55 | 13.77      | ± 0.25 | 11.75 | ± 0.66 | 10.73 | ± 0.52 |
|             | 48 h  | 11.33                  | ± 0.75 | 10.74  | ± 0.78 | 10.87 | ± 0.33 | 13.94                   | ± 1.51 | 12.24     | ± 1.18 | 12.95     | ± 0.83         | 10.96    | ± 0.70 | 10.29     | ± 0.59 | 10.45            | ± 0.91 | 12.91     | ± 0.43 | 14.36            | ± 0.50 | 13.65      | ± 0.47 | 10.10 | ± 0.37 | 10.34 | ± 0.97 |
|             | 120 h | 10.70                  | ± 0.73 | 10.29  | ± 1.08 | 10.01 | ± 0.37 | 12.61                   | ± 1.96 | 11.08     | ± 0.88 | 12.07     | ± 0.50         | 10.49    | ± 1.09 | 9.87      | ± 0.37 | 10.03            | ± 1.16 | 12.12     | ± 0.34 | 13.65            | ± 0.26 | 12.99      | ± 0.58 | 9.20  | ± 0.39 | 8.96  | ± 0.81 |
| 285         | 24 h  | 9.66                   | ± 0.39 | 9.58   | ± 1.00 | 10.27 | ± 0.31 | 11.58                   | ± 0.62 | 12.00     | ± 1.32 | 12.75     | ± 0.66         | 11.17    | ± 0.29 | 9.17      | ± 0.29 | 10.21            | ± 0.26 | 12.58     | ± 0.39 | 14.41            | ± 0.95 | 14.00      | ± 0.50 | 13.33 | ± 1.53 | 12.33 | ± 0.58 |
|             | 48 h  | 9.41                   | ± 0.52 | 9.04   | ± 1.28 | 9.53  | ± 0.73 | 10.66                   | ± 1.04 | 11.45     | ± 1.43 | 11.57     | ± 0.75         | 10.12    | ± 0.34 | 8.75      | ± 0.44 | 9.08             | ± 0.39 | 11.53     | ± 0.29 | 12.68            | ± 0.35 | 12.20      | ± 0.64 | 10.53 | ± 0.64 | 9.70  | ± 0.18 |
|             | 120 h | 8.99                   | ± 0.45 | 8.33   | ± 0.69 | 8.74  | ± 0.38 | 10.12                   | ± 0.34 | 11.31     | ± 1.04 | 10.91     | ± 0.19         | 9.66     | ± 0.07 | 8.11      | ± 0.22 | 8.12             | ± 0.57 | 11.20     | ± 0.32 | 12.12            | ± 0.69 | 11.12      | ± 1.02 | 9.61  | ± 1.56 | 9.03  | ± 0.26 |
| POM1        | 24 h  | 9.87                   | ± 0.87 | 8.70   | ± 0.94 | 9.62  | ± 0.76 | 9.54                    | ± 0.56 | 9.71      | ± 0.83 | 9.82      | ± 0.50         | 8.53     | ± 0.41 | ND        |        | 5.25             | ± 4.55 | 7.29      | ± 6.56 | 10.56            | ± 1.20 | 9.53       | ± 1.61 | 10.21 | ± 0.71 | 10.61 | ± 0.90 |
|             | 48 h  | 8.83                   | ± 0.51 | 5.75   | ± 4.99 | 8.67  | ± 0.58 | ND                      |        | 8.91      | ± 0.80 | 9.41      | ± 0.88         | 8.50     | ± 0.50 | ND        |        | 5.00             | ± 4.33 | 6.99      | ± 6.21 | 9.99             | ± 1.20 | 9.37       | ± 1.56 | 9.99  | ± 0.95 | 9.83  | ± 0.19 |
|             | 120 h | ND                     |        | ND     |        | 5.33  | ± 4.66 | ND                      |        | ND        |        | 5.73      | ± 4.97         | ND       |        | ND        |        | ND               |        | 6.33      | ± 5.51 | 6.33             | ± 5.51 | 9.11       | ± 1.57 | 9.93  | ± 1.01 | 9.73  | ± 0.12 |
| 4186        | 24 h  | 6.39                   | ± 5.71 | 9.13   | ± 0.75 | 8.79  | ± 1.14 | 9.17                    | ± 1.76 | 9.84      | ± 1.89 | 9.61      | ± 1.24         | 8.83     | ± 0.76 | 5.74      | ± 4.98 | 5.33             | ± 4.62 | 6.08      | ± 5.44 | 10.58            | ± 0.73 | 11.12      | ± 0.34 | 10.79 | ± 0.37 | 10.87 | ± 0.13 |
|             | 48 h  | ND                     |        | 8.61   | ± 0.38 | 8.38  | ± 0.72 | 6.67                    | ± 5.86 | ND        |        | 6.41      | ± 5.67         | 8.03     | ± 0.73 | ND        |        | ND               |        | ND        |        | 9.89             | ± 1.02 | 10.45      | ± 0.57 | 10.67 | ± 0.38 | 7.03  | ± 6.09 |
|             | 120 h | ND                     |        | ND     |        | ND    |        | ND                      |        | ND        |        | ND        |                | ND       |        | ND        |        | ND               |        | ND        |        | 6.53             | ± 5.71 | ND         |        | ND    |        | ND    |        |
| sterile     | 24 h  | ND                     |        | ND     |        | ND    |        | ND                      |        | ND        |        | ND        |                | ND       |        | ND        |        | ND               |        | ND        |        | 10.41            | ± 0.63 | ND         |        | 9.11  | ± 0.58 | 9.17  | ± 0.29 |
|             | 48 h  | ND                     |        | ND     |        | ND    |        | ND                      |        | ND        |        | ND        |                | ND       |        | ND        |        | ND               |        | ND        |        | 9.93             | ± 0.83 | ND         |        | 9.28  | ± 0.60 | 9.17  | ± 0.29 |
|             | 120 h | ND                     |        | ND     |        | ND    |        | ND                      |        | ND        |        | ND        |                | ND       |        | ND        |        | ND               |        | ND        |        | 9.93             | ± 0.83 | ND         |        | 8.60  | ± 1.00 | 8.67  | ± 0.58 |
| non-sterile | 24 h  | ND                     |        | ND     |        | ND    |        | ND                      |        | ND        |        | ND        |                | ND       |        | ND        |        | ND               |        | ND        |        | 8.67             | ± 0.58 | ND         |        | 7.80  | ± 0.35 | 7.80  | ± 0.35 |
|             | 48 h  | ND                     |        | ND     |        | ND    |        | ND                      |        | ND        |        | ND        |                | ND       |        | ND        |        | ND               |        | ND        |        | 8.33             | ± 0.31 | ND         |        | 7.60  | ± 0.53 | 7.33  | ± 0.12 |
|             | 120 h | ND                     |        | ND     |        | ND    |        | ND                      |        | ND        |        | ND        |                | ND       |        | ND        |        | ND               |        | ND        |        | 8.07             | ± 0.50 | ND         |        | 4.80  | ± 4.16 | 4.80  | ± 4.16 |

ND: not detected

**Table S3.** Inhibition zones, expressed in mm, of all the extract obtained after melon by-products lacto-fermentation. Different LAB were used for the fermentations. *L. plantarum* POM1 and 285, *L. paracasei* 4186, *L. casei* 2246 and 2240 and *L. rhamnosus* 1473 and 1019. The inhibition zones were obtained using 30 µl of extracts concentrated 60 % (w/v).
